# Supplementary material
Source: Springer Nature journal article supplement (https://www.springermedizin.de/resource/supplementary/12885_2013_4240_MOESM3_ESM.pdf/9465868)

# HONE1

BBR ( $\mu\text{M}$ )

0

25

50

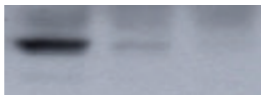

p-Stat 3

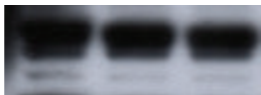

Stat 3

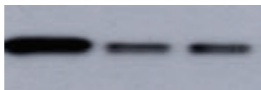

Mcl-1

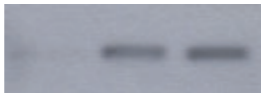

Cleaved  
PARP

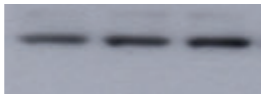

$\beta$ -actin

Supplement: MOESM3 [file 9465868]
